# Supplementary material for: The transcription factors Pap1 and Prr1 collaborate to activate antioxidant, but not drug tolerance, genes in response to H2O2
Source: PubMed Central journal article supplement — Nucleic Acids Res. 2012 Feb 16;40(11):4816–24. doi: 10.1093/nar/gks141 (PMC3367182; doi:10.1093/nar/gks141), 2012-02-16
Supplement: supp_gks141_nar-03079-v-2011-File008.pdf [file supp_gks141_nar-03079-v-2011-File008.pdf]

Supplementary Data (Calvo et al., 2012)

Supplementary Table S1. Strains used in this study

| Strain                                    | Genotype                                                                                              | Origin    |
|-------------------------------------------|-------------------------------------------------------------------------------------------------------|-----------|
| 972                                       | <i>h<sup>-</sup></i>                                                                                  | (39)      |
| NG25                                      | <i>h<sup>+</sup> caf4/trr1::ura4<sup>+</sup> ura4-D18</i>                                             | (40)      |
| EHH14                                     | <i>h<sup>-</sup> his2 ura4 pap1::ura4<sup>+</sup> leu1-32 nmt::GFP-pap1::leu1<sup>+</sup></i>         | (41)      |
| EHH14.C523D                               | <i>h<sup>-</sup> his2 ura4 pap1::ura4-D18 leu1-32 nmt::GFP pap1C523D::leu1<sup>+</sup></i>            | (41)      |
| AV19                                      | <i>h<sup>+</sup> trr1::ura4<sup>+</sup> ura4-D18 ade6-704 leu1-32 nmt::GFP-pap1::leu1<sup>+</sup></i> | This work |
| <i>caf1<sup>+</sup>::ura4<sup>+</sup></i> | <i>h<sup>+</sup> caf1/hba1::ura4<sup>+</sup> ura4-D18 ade6-704 leu1-32</i>                            | (42)      |
| EA33                                      | <i>h<sup>+</sup> caf1::ura4<sup>+</sup> ura4-D18 ade6-704 leu1-32 nmt::GFP-pap1::leu1<sup>+</sup></i> | (41)      |
| IC1                                       | <i>h<sup>-</sup> pap1::ura4<sup>+</sup> ura4-D18 leu1-32</i>                                          | This work |
| IC2                                       | <i>h<sup>-</sup> pap1 ura4-D18 leu1-32</i>                                                            | This work |
| IC2.C523D                                 | <i>h<sup>-</sup> pap1.C523D ura4-D18 leu1-32</i>                                                      | This work |
| MS46                                      | <i>h<sup>+</sup> atf1::kanMX6 ura4-D18 leu1-32</i>                                                    | This work |
| MC16                                      | <i>h<sup>-</sup> prr1::kanMX6 ura4-D18 leu1-32</i>                                                    | This work |
| MC18                                      | <i>h<sup>-</sup> pap1::ura4<sup>+</sup> ura4-D18 prr1::kanMX6 leu1-32</i>                             | This work |
| MC40                                      | <i>h<sup>-</sup> prr1-HA::kanMX6 ura4-D18 leu1-32</i>                                                 | This work |
| IC64                                      | <i>h<sup>-</sup> prr1-HA::kanMX6 pap1::natMX6 ura4-D18 leu1-32</i>                                    | This work |
| MC41                                      | <i>h<sup>-</sup> prr1-GFP::kanMX6 ura4-D18 leu1-32</i>                                                | This work |
| MC42                                      | <i>h<sup>-</sup> pap1-GFP::kanMX6 ura4-D18 leu1-32</i>                                                | This work |
| IC81                                      | <i>h<sup>-</sup> prr1::kanMX6 leu1-32 nmt::GFP-pap1::leu1<sup>+</sup> ura4-D18</i>                    | This work |
| IC83                                      | <i>h<sup>+</sup> pap1::ura4<sup>+</sup> prr1-GFP::kanMX6 his2 ura4-D18 leu1-32</i>                    | This work |
| PG3                                       | <i>h<sup>+</sup> prr1-HA::kanMX6 pap1.C523D::natMX6 ura4-D18 leu1-32</i>                              | This work |
| PG7                                       | <i>h<sup>-</sup> caf4::ura4<sup>+</sup> prr1-HA::kanMX6 leu1-32</i>                                   | This work |
| IC70                                      | <i>h<sup>-</sup> pap1-HA::kanMX6 ura4-D18 leu1-32</i>                                                 | This work |
| IC102                                     | <i>h<sup>-</sup> trr1::ura4<sup>+</sup> prr1-GFP::natMX6 leu1-32</i>                                  | This work |
| PG20                                      | <i>h<sup>-</sup> hba1::ura4<sup>+</sup> prr1-GFP::natMX6 ade6-704 leu1-32</i>                         | This work |
| IC97                                      | <i>h<sup>-</sup> pap1.C523D::ura4<sup>+</sup> prr1-GFP::natMX6 leu1-32</i>                            | This work |
| PG21                                      | <i>h<sup>-</sup> prr1::kanMX6 pap1::natMX6 ura4-29 leu1-32</i>                                        | This work |
| PG15                                      | <i>h<sup>-</sup> pap1::ura4<sup>+</sup> atf1::natMX6 leu1-32</i>                                      | This work |
| EP137                                     | <i>h<sup>-</sup> mpr1::natMX6 ura4-D18 leu1-32</i>                                                    | This work |
| IC86                                      | <i>h<sup>-</sup> mpr1::natMX6 prr1-HA::kanMX6 ura4-D18 leu1-32</i>                                    | This work |

## Supplementary references

39. Leupold, U. (1970) Genetical methods for *Schizosaccharomyces pombe*. *Methods Cell Physiol.*, **4**, 169-177.
40. Calvo, I.A., Gabrielli, N., Iglesias-Baena, I., Garcia-Santamarina, S., Hoe, K.L., Kim, D.U., Sanso, M., Zuin, A., Perez, P., Ayte, J. *et al.* (2009) Genome-wide screen of genes required for caffeine tolerance in fission yeast. *PLoS One*, **4**, e6619.
41. Castillo, E.A., Ayte, J., Chiva, C., Moldon, A., Carrascal, M., Abian, J., Jones, N. and Hidalgo, E. (2002) Diethylmaleate activates the transcription factor Pap1 by covalent modification of critical cysteine residues. *Mol.Microbiol.*, **45**, 243-254.
42. Benko, Z., Sipiczki, M. and Carr, A.M. (1998) Cloning of *caf1+*, *caf2+* and *caf4+* from *Schizosaccharomyces pombe*: their involvement in multidrug resistance, UV and pH sensitivity. *Mol.Gen.Genet.*, **260**, 434-443.

## SUPPLEMENTARY FIGURE LEGENDS – Calvo *et al.* 2012

**Supplementary Figure S1.** Constitutively reduced/nuclear Pap1 can only bind and activate a subset of all Pap1-dependent genes. **(A)** Stress-dependent transcriptional analysis of wild-type and mutant strains. Total RNA from strains IC2 (WT) and  $\Delta hba1$  (*caf1::ura4<sup>+</sup>*) was obtained from cultures treated or not with 0.2 mM H<sub>2</sub>O<sub>2</sub> for the indicated times and analyzed by Northern blot as described in Figure 2A. **(B)** Binding of reduced/nuclear Pap1 to DNA *in vivo*. Cultures of strains such as those used in A were treated with 0.2 mM H<sub>2</sub>O<sub>2</sub> for 5 min. CHIP analysis was performed as described in Figure 2B.

**Supplementary Figure S2.** Regulation of Prr1 by Mpr1 is not necessary for induction of Pap1-dependent genes. **(A)** Total RNA from strains IC2 (WT) and EP137 ( $\Delta mpr1$ ) was obtained from cultures treated with 0.2 mM H<sub>2</sub>O<sub>2</sub> for the indicated times, and analyzed by Northern blot as described in Figure 2A. **(B)** Binding of Prr1-HA to DNA *in vivo* in  $\Delta mpr1$  strain. Cultures of strains MC40 (*prr1-HA*) and IC86 ( $\Delta mpr1$  *prr1-HA*) were treated or not with 0.2 mM H<sub>2</sub>O<sub>2</sub> for 5 min. CHIP of Prr1-HA using anti-HA antibody was performed as described in Figure 2B.

**Supplementary Figure S3.** Over-expression of reduced/nuclear Pap1 triggers constitutive transcription of not only *caf5* but also *trr1*. **(A)** The redox state and relative protein levels of Pap1 of extracts from strains EHH14 ( $\Delta pap1$  *nm1::pap1*; the expression of GFP-Pap1 is under the control of the *nm141* promoter), EHH14.C523D ( $\Delta pap1$  *nm1::pap1.C523D*), IC2 (WT) and IC2.C523D (*pap1.C523D*), before (-) or after 5 min of 0.2 mM H<sub>2</sub>O<sub>2</sub> stress, was analyzed by Western blot using polyclonal anti-Pap1 antibodies. **(B)** Northern blot analysis of antioxidant Pap1-dependent gene (*trr1*) and drug tolerance gene (*caf5*) expression. Total RNA from strains as in Figure S3A was obtained from cultures treated or not (-) with 0.2 mM H<sub>2</sub>O<sub>2</sub> for 15 min and analyzed by Northern blot as described in Figure 2A. **(C)** Prr1 over-expression does not trigger induction of Pap1-dependent genes. Total RNA from strains IC2 (WT), IC1 ( $\Delta pap1$ ), MC16 ( $\Delta prr1$ ), PG21 ( $\Delta pap1$   $\Delta prr1$ ), PG15 ( $\Delta pap1$   $\Delta atf1$ ) and PG21 with p397.41 ( $\Delta pap1$   $\Delta prr1$  with *pnmt41::prr1*), treated or not (-) with 0.2 mM H<sub>2</sub>O<sub>2</sub> for 15 min, was obtained and analyzed by Northern blot as described in Figure 2A.

**Supplementary Figure S4.** Diethylmaleate and Leptomycin B do not induce the antioxidant response. **(A)** Total RNA from strains IC2 (WT) and IC1 ( $\Delta pap1$ ) was obtained from cultures treated with 0.2 mM H<sub>2</sub>O<sub>2</sub> for 15 min (H) and 4 mM diethylmaleate for 30 min (D) and analyzed by Northern blot as described in Figure 2A. **(B)** RNA from wild-type strain IC2 was obtained from cultures treated with 0.2 mM H<sub>2</sub>O<sub>2</sub> for 15 min (H) or 100  $\mu$ M of Leptomycin B (LMB) for 60 and 90 min and analyzed by Northern blot as described in Figure 2A.

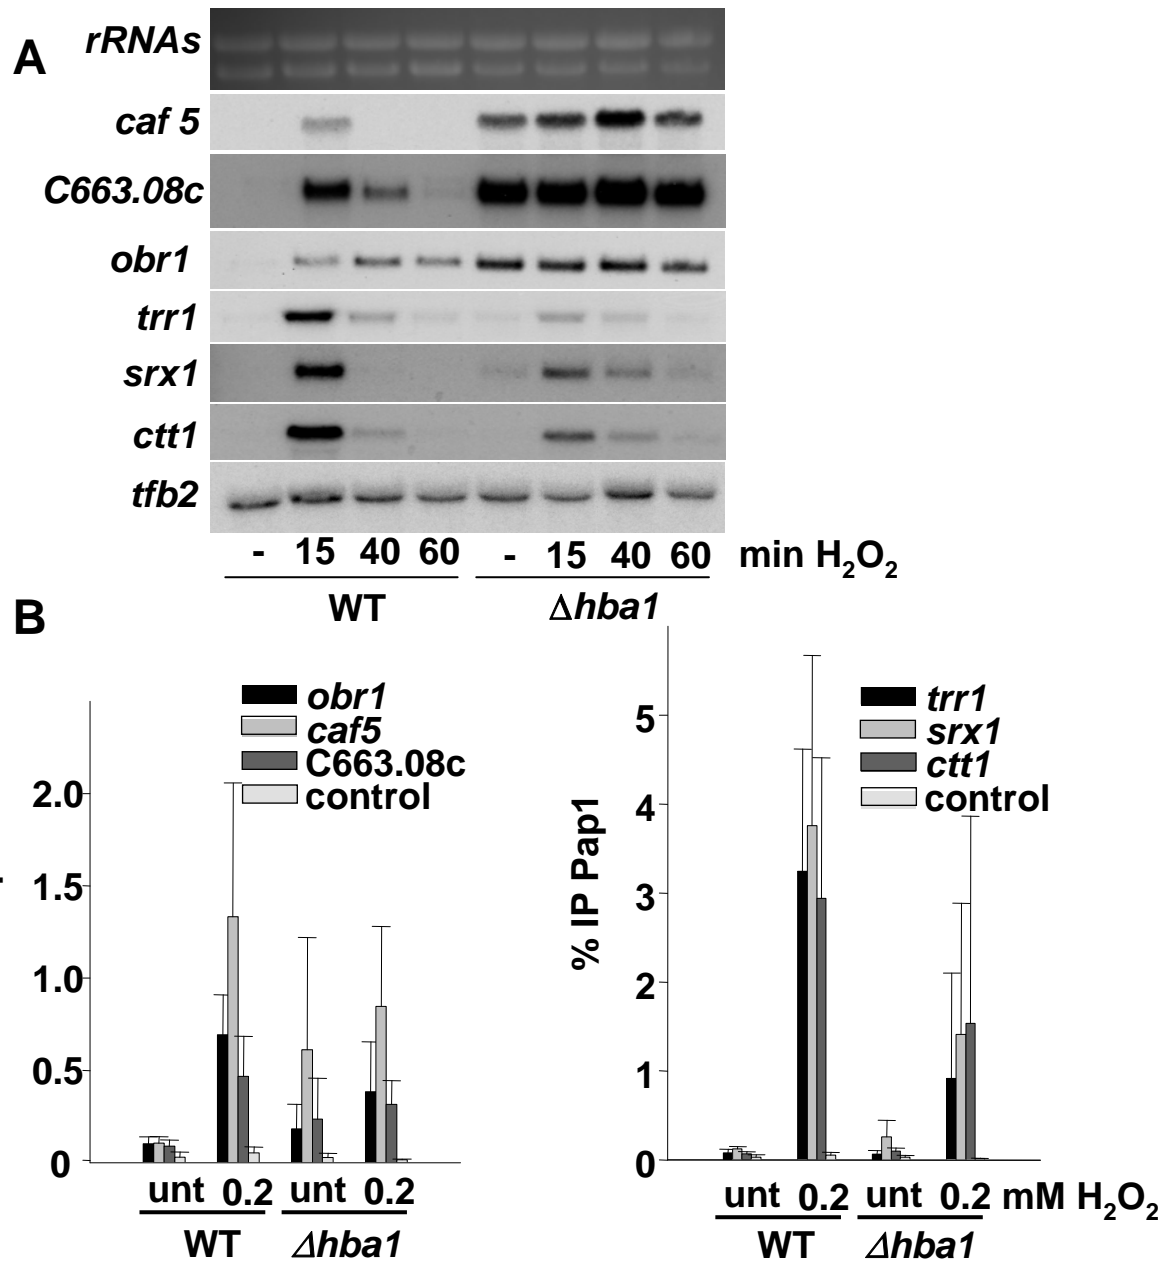

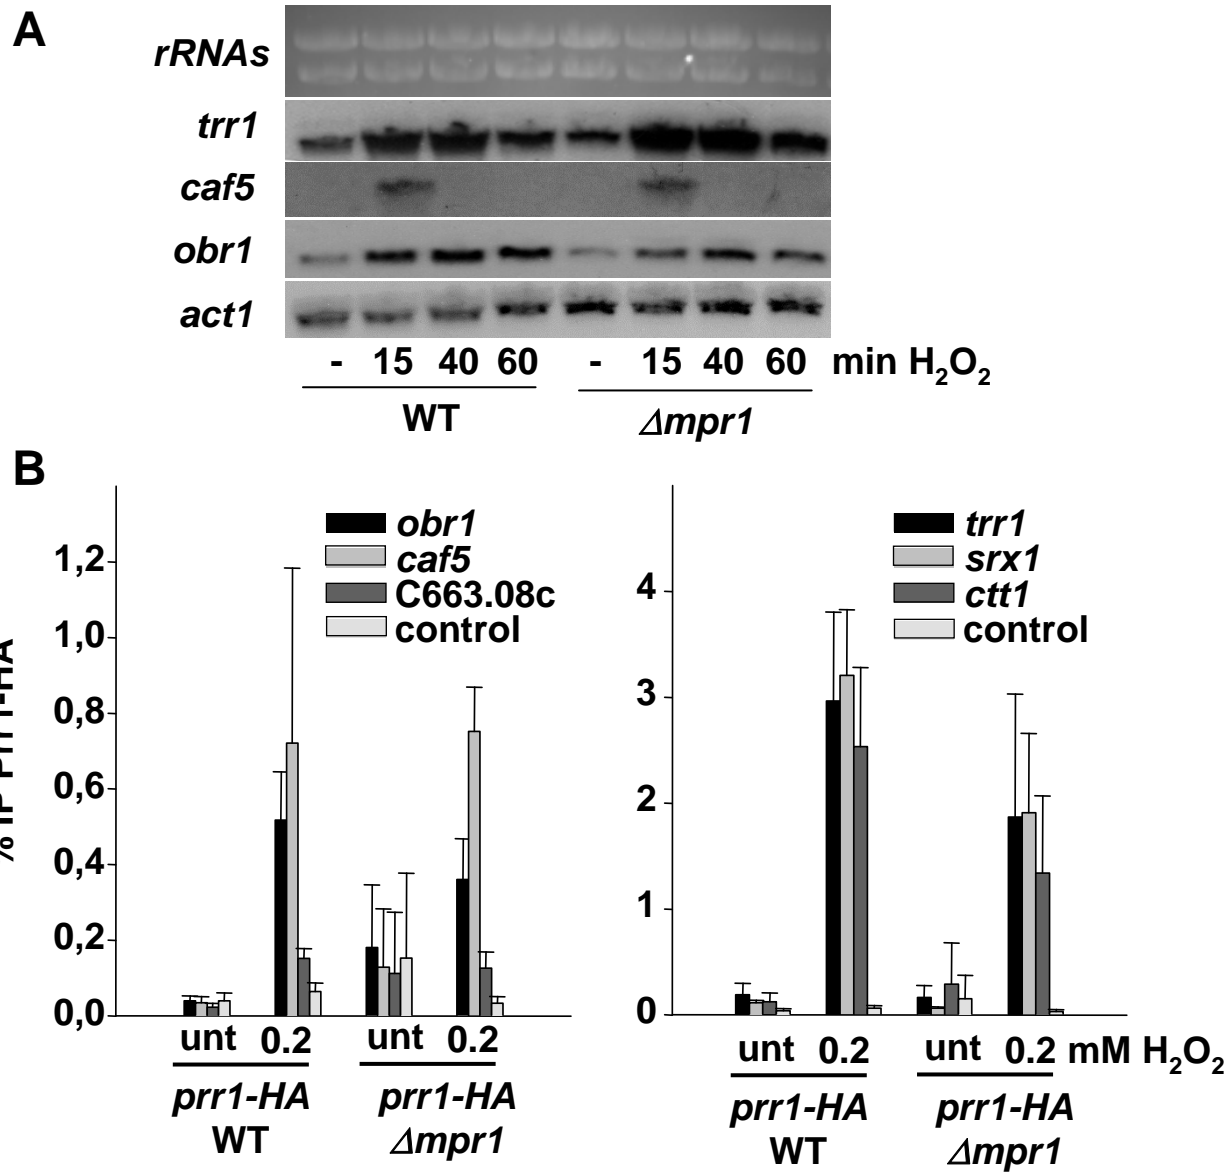

Calvo et al. Supplementary Figure S2

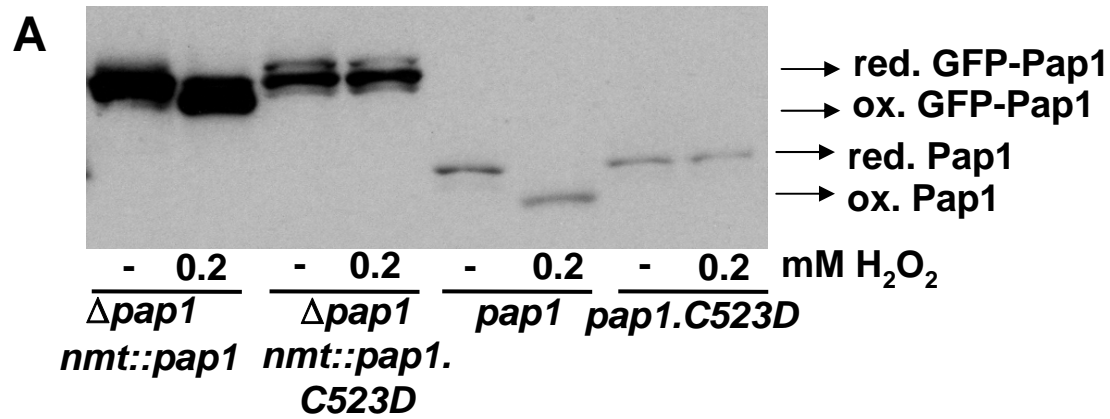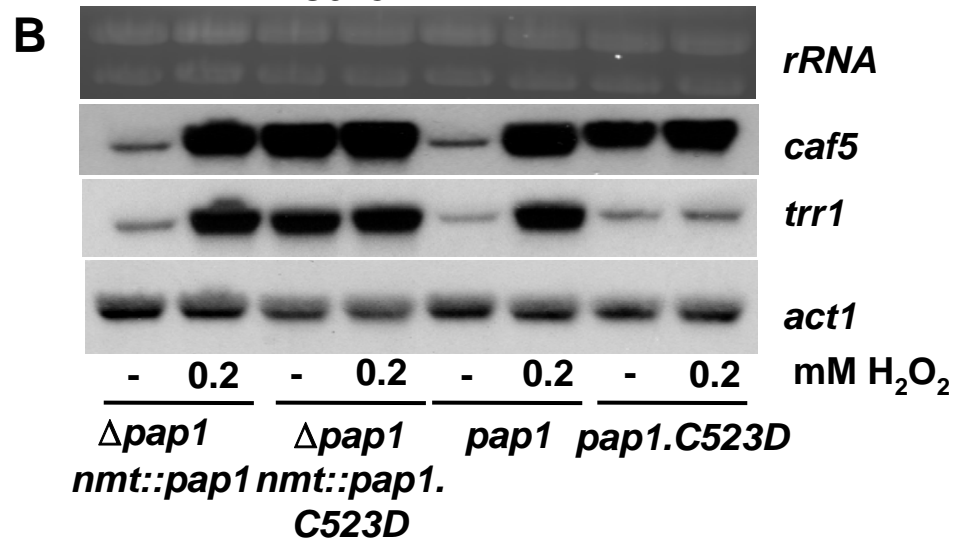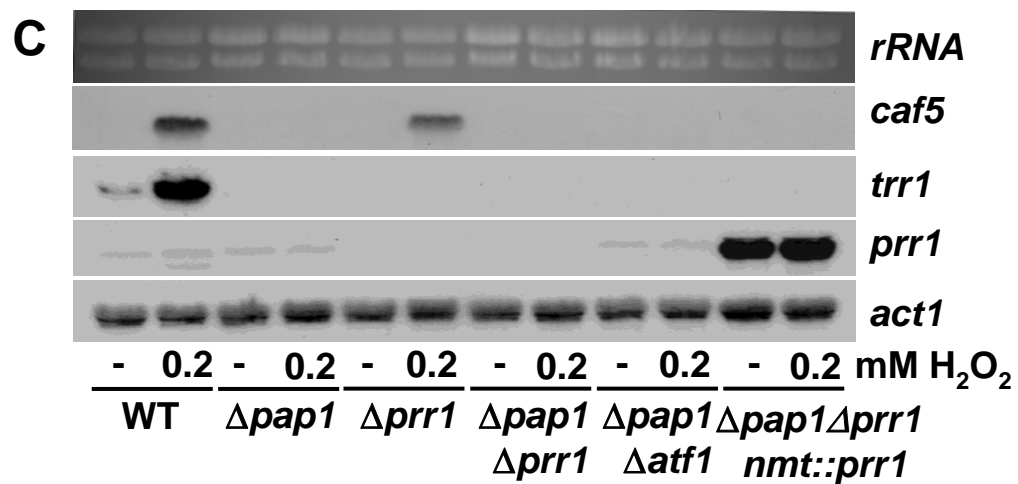

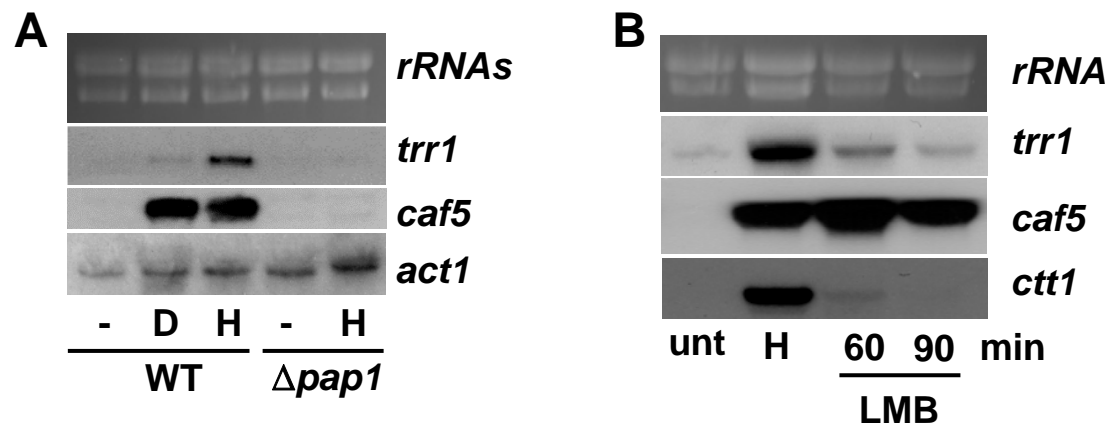

Calvo et al. Supplementary Figure S4
